# Supplementary material
Source: HighWire-hosted journal article supplement (https://bmjopen.bmj.com/content/13/8/e070359)
Supplement: inline-supplementary-material-2 [file inline-supplementary-material-2.pdf]

## Additional file 2 – 251 sample studies

| Random Number | doi or PMID                                                                                                                                             | Primary | Secondary | excluded | reason for exclusion              |
|---------------|---------------------------------------------------------------------------------------------------------------------------------------------------------|---------|-----------|----------|-----------------------------------|
| 24            | <a href="https://doi.org/10.1037//0278-6133.9.3.237">10.1037//0278-6133.9.3.237</a>                                                                     |         | 1         |          |                                   |
| 25            | <a href="https://doi.org/10.1016/0277-9536(90)90118-c">10.1016/0277-9536(90)90118-c</a>                                                                 | 1       |           |          |                                   |
| 47            | <a href="https://doi.org/10.1007/BF00848378">10.1007/BF00848378</a>                                                                                     | 1       |           |          |                                   |
| 56            | <a href="https://doi.org/10.1093/geront/32.4.444">10.1093/geront/32.4.444</a>                                                                           | 1       |           |          |                                   |
| 61            | PMID: <b>1293426</b>                                                                                                                                    | 1       |           |          |                                   |
| 96            | <a href="https://doi.org/10.1006/pmed.1995.1083">10.1006/pmed.1995.1083</a>                                                                             |         | 1         |          |                                   |
| 114           | <a href="https://doi.org/10.4278/0890-1171-10.5.371">10.4278/0890-1171-10.5.371</a>                                                                     | 1       |           |          |                                   |
| 135           | <a href="https://doi.org/10.1006/pmed.1997.0141">10.1006/pmed.1997.0141</a>                                                                             | 1       |           |          |                                   |
| 136           | <a href="https://doi.org/10.1097/00008483-199705000-00001">10.1097/00008483-199705000-00001</a>                                                         |         | 1         |          |                                   |
| 138           | 10.1007/BF02892289                                                                                                                                      |         |           | 1        | review                            |
| 139           | <a href="https://doi.org/10.1177/089826439700900306">10.1177/089826439700900306</a>                                                                     | 1       |           |          |                                   |
| 140           | 10.1080/02701367.1997.10608003                                                                                                                          | 1       |           |          |                                   |
| 180           | PMID: <b>1287009</b>                                                                                                                                    |         |           | 1        | review                            |
| 187           | <a href="https://doi.org/10.1002/j.1550-8528.1999.tb00408.x">10.1002/j.1550-8528.1999.tb00408.x</a>                                                     |         | 1         |          |                                   |
| 200           | PMID: <b>10689987</b>                                                                                                                                   |         |           | 1        | self-efficacy toward non-exercise |
| 206           | <a href="https://doi.org/10.1002/1529-0131(199910)12:5&lt;336::aid-art5&gt;3.0.co;2-e">10.1002/1529-0131(199910)12:5&lt;336::aid-art5&gt;3.0.co;2-e</a> | 1       |           |          |                                   |
| 215           | <a href="https://doi.org/10.3928/0098-9134-20000301-08">10.3928/0098-9134-20000301-08</a>                                                               | 1       |           |          |                                   |
| 217           | 10.1007/BF02895777                                                                                                                                      | 1       |           |          |                                   |
| 218           | <a href="https://doi.org/10.1378/chest.117.5.1359">10.1378/chest.117.5.1359</a>                                                                         |         | 1         |          |                                   |
| 221           | 10.1177/014572170002600312                                                                                                                              |         | 1         |          |                                   |
| 237           | <a href="https://doi.org/10.1207/S15324796ABM23013">10.1207/S15324796ABM23013</a>                                                                       | 1       |           |          |                                   |
| 244           | <a href="https://doi.org/10.1080/02701367.2001.10608930">10.1080/02701367.2001.10608930</a>                                                             |         | 1         |          |                                   |
| 254           | 10.1177/089826430101300207                                                                                                                              | 1       |           |          |                                   |
| 258           | 10.2466/pms.2001.92.3c.1129                                                                                                                             | 1       |           |          |                                   |
| 295           | <a href="https://doi.org/10.1080/073993302317346325">10.1080/073993302317346325</a>                                                                     |         |           | 1        | self-efficacy toward non-exercise |
| 300           | 10.3928/0098-9134-20020601-10                                                                                                                           | 1       |           |          |                                   |
| 308           | <a href="https://doi.org/10.1080/026404102320219400">10.1080/026404102320219400</a>                                                                     | 1       |           |          |                                   |
| 338           | <a href="https://doi.org/10.1348/014466603763276162">10.1348/014466603763276162</a>                                                                     |         | 1         |          |                                   |
| 356           | PMID: <b>12937530</b>                                                                                                                                   |         |           | 1        | self-efficacy toward non-exercise |
| 363           | 10.1055/s-2003-40706                                                                                                                                    | 1       |           |          |                                   |
| 396           | 10.3200/JRLP.138.1.35-48                                                                                                                                | 1       |           |          |                                   |
| 397           | PMID: <b>15230025</b>                                                                                                                                   | 1       |           |          |                                   |
| 447           | 10.1159/000080175                                                                                                                                       |         |           | 1        | self-efficacy toward non-exercise |
| 456           | 10.1097/01.jnr.0000387510.52243.c8                                                                                                                      |         | 1         |          |                                   |
| 457           | <a href="https://doi.org/10.4040/jkan.2004.34.7.1277">10.4040/jkan.2004.34.7.1277</a>                                                                   |         | 1         |          |                                   |

|     |                                                  |   |   |                                   |
|-----|--------------------------------------------------|---|---|-----------------------------------|
| 487 | PMID: 16028726                                   |   | 1 | self-efficacy toward non-exercise |
| 488 | 10.1037/0882-7974.20.2.272                       |   | 1 | meta-analysis                     |
| 502 | 10.1207/s15324796abm3001_4                       | 1 |   |                                   |
| 505 | <a href="#">10.4040/jkan.2005.35.5.787</a>       |   | 1 | self-efficacy toward non-exercise |
| 528 | <a href="#">10.1016/j.jadohealth.2004.09.019</a> | 1 |   |                                   |
| 538 | 10.1249/01.mss.0000183373.95206.2f               | 1 |   |                                   |
| 541 | <a href="#">10.4278/0890-1171-20.3.200</a>       | 1 |   |                                   |
| 569 | 10.1002/j.2048-7940.2006.tb00016.x               | 1 |   |                                   |
| 571 | 10.5555/ajhb.2006.30.3.290                       | 1 |   |                                   |
| 627 | <a href="#">10.1136/bjbm.28.3.160</a>            | 1 |   |                                   |
| 633 | <a href="#">10.1123/jsep.34.6.737</a>            |   | 1 | self-efficacy toward non-exercise |
| 635 | <a href="#">10.1080/13548500903111806</a>        |   | 1 |                                   |
| 647 | 10.1016/j.srhc.2020.100542                       |   | 1 |                                   |
| 648 | 10.1186/s12891-019-2714-x                        |   | 1 | protocol                          |
| 658 | PMID: 27182388                                   |   | 1 |                                   |
| 661 | <a href="#">10.1080/02701367.2011.10599726</a>   |   | 1 |                                   |
| 683 | 10.1097/SMJ.0b013e3181f6d3d4                     |   | 1 |                                   |
| 690 | PMID: 1735658                                    |   | 1 |                                   |
| 695 | 10.1123/jsep.2017-0155                           |   | 1 | meta-analysis                     |
| 699 | 10.22605/RRH5419                                 | 1 |   |                                   |
| 702 | 10.1016/j.jadohealth.2003.07.025                 | 1 |   |                                   |
| 724 | 10.1016/j.pain.2004.03.022                       |   | 1 |                                   |
| 734 | 10.1111/j.1745-7599.2012.00794.x                 |   | 1 |                                   |
| 780 | PMID: 25123117                                   |   | 1 |                                   |
| 789 | 10.1007/BF03324665                               | 1 |   |                                   |
| 792 | 10.1080/02640414.2019.1570590                    | 1 |   |                                   |
| 794 | 10.3390/medicina56080404                         | 1 |   |                                   |
| 798 | 10.1080/09638288.2019.1631397                    |   | 1 |                                   |
| 822 | 10.1177/2050312116668933                         |   | 1 |                                   |
| 827 | 10.1177/1090198116648266                         | 1 |   |                                   |
| 835 | 10.1123/jsep.33.3.394                            | 1 |   |                                   |
| 839 | 10.1155/2020/6215428                             |   | 1 | qualitative case study            |
| 846 | <a href="#">10.1016/j.apmr.2009.06.019</a>       |   | 1 |                                   |
| 867 | 10.1155/2013/282315                              | 1 |   |                                   |
| 882 |                                                  | 1 |   |                                   |
|     | <a href="#">PMID: 1293426</a>                    |   |   |                                   |
| 891 | PMID: 7950092                                    |   | 1 |                                   |
| 893 | 10.14283/jfa.2012.29                             | 1 |   |                                   |
| 907 | 10.3390/ijerph17186745                           | 1 |   |                                   |
| 922 | 10.2174/1745017901713010200                      |   | 1 |                                   |

|      |                                  |   |   |                                          |
|------|----------------------------------|---|---|------------------------------------------|
| 954  | 10.4278/ajhp.091214-QUAN-393     | 1 |   |                                          |
| 959  | 10.1016/j.bodyim.2014.02.004     | 1 |   |                                          |
| 992  | 10.1016/j.maturitas.2017.09.003  |   | 1 | review                                   |
| 1000 | 10.1111/j.1600-0838.2012.01490.x |   | 1 |                                          |
| 1003 | 10.1177/1054773820967699         |   | 1 |                                          |
| 1015 | 10.3389/fpsyg.2018.02402         | 1 |   |                                          |
| 1032 | 10.1188/13.ONF.472-480           |   | 1 |                                          |
| 1058 | 10.1016/j.ejcnurse.2010.06.005   |   | 1 |                                          |
| 1060 | 10.1016/j.enfcli.2015.02.001     |   | 1 |                                          |
| 1092 | 10.1097/PEP.0b013e3181705814     | 1 |   |                                          |
| 1121 | 10.31616/asj.2018.0172           |   | 1 | protocol                                 |
| 1145 | 10.1519/JSC.0000000000002285     | 1 |   |                                          |
| 1147 | 10.3389/fpsyg.2019.01495         | 1 |   |                                          |
| 1171 | 10.4103/ijoy.IJOY_49_18          |   | 1 | no self-efficacy measured                |
| 1179 | 10.1177/0193945918818183         |   | 1 |                                          |
| 1228 | 10.1007/s11916-019-0750-8        |   | 1 | review                                   |
| 1244 | 10.1111/bjhp.12343               | 1 |   |                                          |
| 1266 | 10.1097/WON.0b013e3182648055     |   | 1 |                                          |
| 1268 | 10.1186/s12955-018-1066-9        |   | 1 | review                                   |
| 1269 | 10.3390/sports7010003            | 1 |   |                                          |
| 1280 | 10.1016/j.ijnurstu.2018.08.009   |   | 1 |                                          |
| 1337 | 10.1177/1054773816683504         |   | 1 |                                          |
| 1352 | 10.3389/fpsyg.2018.01174         | 1 |   |                                          |
| 1353 | 10.2196/formative.9963           |   | 1 | self-efficacy toward non-exercise review |
| 1360 | 10.1080/09593985.2017.1422204    |   | 1 | review                                   |
| 1377 | 10.1038/s41533-018-0085-7        |   | 1 | review                                   |
| 1395 | 10.1186/s12884-018-1771-8        |   | 1 |                                          |
| 1400 | 10.1371/journal.pone.0068091     |   | 1 | no self-efficacy measured                |
| 1407 | 10.1097/JCN.0000000000000456     |   | 1 |                                          |
| 1427 | 10.1016/j.dhjo.2017.09.001       |   | 1 | qualitative study                        |
| 1443 | 10.1007/s10484-017-9386-9        | 1 |   |                                          |
| 1457 | 10.1186/s12891-018-1965-2        |   | 1 | protocol                                 |
| 1478 | 10.1093/geroni/igy007            |   | 1 | no self-efficacy measured                |
| 1500 | 10.2196/mhealth.6394             |   | 1 |                                          |
| 1513 | 10.1177/0193945916678374         |   | 1 |                                          |
| 1520 | 10.1093/geront/gnw105            | 1 |   |                                          |
| 1534 | 10.1136/bmjopen-2017-016966      |   | 1 |                                          |
| 1556 | 10.3390/ijerph14080862           | 1 |   |                                          |
| 1561 | 10.1016/j.joca.2017.03.007       | 1 |   |                                          |
| 1562 | 10.23736/S1973-9087.17.04482-3   |   | 1 |                                          |
| 1571 | 10.1016/j.ptsp.2017.05.004       |   | 1 |                                          |

|      |                                     |   |   |                                            |
|------|-------------------------------------|---|---|--------------------------------------------|
| 1574 | 10.5271/sjweh.3634                  | 1 |   |                                            |
| 1594 | 10.1007/s10865-017-9822-6           |   | 1 |                                            |
| 1613 | 10.1186/s40945-017-0032-x           |   | 1 |                                            |
| 1614 | 10.1136/bmjopen-2016-013121         |   | 1 |                                            |
| 1617 | 10.1891/1061-3749.25.1.22           |   | 1 |                                            |
| 1620 | 10.1111/ijn.12519                   |   | 1 |                                            |
| 1630 | 10.1177/0269215516649226            |   | 1 |                                            |
| 1640 | 10.1089/acm.2016.0303               |   | 1 | self-efficacy toward non-exercise protocol |
| 1684 | 10.2196/resprot.6402                |   | 1 |                                            |
| 1690 | 10.1080/02701367.2016.1233314       | 1 |   |                                            |
| 1768 | 10.2147/PPA.S106938                 |   | 1 |                                            |
| 1826 | 10.1097/HCR.00000000000000170       |   | 1 |                                            |
| 1829 | 10.1177/1359105314536452            |   | 1 |                                            |
| 1842 | 10.1123/jpah.2015-0108              | 1 |   |                                            |
| 1878 | 10.2196/jmir.5235                   | 1 |   |                                            |
| 1889 | 10.2340/16501977-2041               |   | 1 | self-efficacy toward non-exercise review   |
| 1896 | 10.1146/annurev-psych-122414-033237 |   | 1 |                                            |
| 1911 | 10.1016/j.ypped.2015.08.011         |   | 1 | self-efficacy toward non-exercise          |
| 1912 | 10.1016/j.appet.2015.07.012         |   | 1 | self-efficacy toward non-exercise review   |
| 1933 | 10.1164/rccm.201505-0929CI          |   | 1 |                                            |
| 1981 | 10.1089/pop.2014.0120               |   | 1 |                                            |
| 1987 | PMID: 26360967                      | 1 |   |                                            |
| 1994 | 10.1016/j.jphys.2015.05.007         |   | 1 |                                            |
| 2007 | 10.4040/jkan.2015.45.3.329          |   | 1 |                                            |
| 2011 | 10.1093/rheumatology/keu444         |   | 1 |                                            |
| 2013 | 10.1007/s40519-014-0159-7           |   | 1 |                                            |
| 2020 | 10.1186/s12966-015-0219-z           | 1 |   |                                            |
| 2023 | 10.1016/j.enfcli.2015.02.001        |   | 1 |                                            |
| 2059 | 10.1007/s00520-014-2422-x           |   | 1 |                                            |
| 2060 | 10.1038/jhh.2014.58                 |   | 1 |                                            |
| 2064 | 10.3389/fpsyg.2015.00121            | 1 |   |                                            |
| 2070 | 10.1002/oby.20945                   |   | 1 | self-efficacy toward non-exercise          |
| 2077 | 10.1080/17430437.2014.997586        | 1 |   |                                            |
| 2082 | 10.1891/0886-6708.VV-D-13-00174     |   | 1 | self-efficacy toward non-exercise          |
| 2090 | 10.1159/000381473                   | 1 |   |                                            |
| 2103 | 10.1080/08964289.2014.914463        |   | 1 |                                            |
| 2112 | 10.1016/j.amepre.2014.08.005        |   | 1 | self-efficacy toward non-exercise          |
| 2128 | 10.1177/0145721714551992            |   | 1 |                                            |
| 2141 | PMID: 25612395                      | 1 |   |                                            |
| 2152 | 10.2196/jmir.3340                   |   | 1 |                                            |

|      |                                   |   |   |                                   |
|------|-----------------------------------|---|---|-----------------------------------|
| 2159 | 10.1177/0269215514527843          |   | 1 | review                            |
| 2164 | 10.1186/1745-6215-15-337          |   | 1 |                                   |
| 2180 | 10.1007/s10865-013-9526-5         | 1 |   |                                   |
| 2208 | 10.1007/s10067-013-2377-1         |   | 1 | self-efficacy toward non-exercise |
| 2229 | 10.1111/hae.12355                 |   | 1 |                                   |
| 2230 | 10.1016/j.outlook.2013.09.003     |   | 1 | self-efficacy toward non-exercise |
| 2241 | 10.1089/g4h.2013.0066             |   | 1 | no self-efficacy measured         |
| 2254 | 10.1002/14651858.CD008963.pub2    |   | 1 | review                            |
| 2256 | 10.1038/nutd.2013.42              |   | 1 |                                   |
| 2257 | 10.1080/21642850.2014.924858      | 1 |   |                                   |
| 2268 | 10.3138/ptc.2012-56BC             |   | 1 |                                   |
| 2314 | 10.1186/1471-2393-13-184          |   | 1 | protocol                          |
| 2330 | PMID: 24194800                    |   | 1 | review                            |
| 2334 | 10.1002/14651858.CD010842.pub2    |   | 1 | review                            |
| 2349 | 10.1016/j.apmr.2017.12.037        |   | 1 |                                   |
| 2352 | 10.1016/j.genhosppsy.2018.03.006  |   | 1 |                                   |
| 2369 | 10.1016/j.ejon.2018.02.009        |   | 1 |                                   |
| 2397 | 10.1097/JCN.0000000000000491      |   | 1 |                                   |
| 2408 | 10.1186/s12889-018-5850-6         | 1 |   |                                   |
| 2431 | 10.1016/j.pec.2018.05.011         |   | 1 | review                            |
| 2443 | 10.2196/10698                     |   | 1 |                                   |
| 2450 | 10.1515/ijamh-2018-0038           | 1 |   |                                   |
| 2465 | 10.1177/0733464816672048          | 1 |   |                                   |
| 2488 | 10.1177/0890117118770106          | 1 |   |                                   |
| 2490 | 10.1016/j.appet.2018.08.009       |   | 1 | self-efficacy toward non-exercise |
| 2493 | 10.1016/j.rehab.2018.09.005       |   | 1 |                                   |
| 2499 | 10.31372/20190401.1000            | 1 |   |                                   |
| 2516 | 10.1186/s12884-019-2185-y         |   | 1 | review                            |
| 2517 | 10.3389/fnins.2019.00058          |   | 1 | no self-efficacy measured         |
| 2553 | 10.1097/JNN.0000000000000425      |   | 1 |                                   |
| 2570 | 10.1177/0886260516658759          |   | 1 | self-efficacy toward non-exercise |
| 2572 | 10.1111/hsc.12697                 |   | 1 | self-efficacy toward non-exercise |
| 2583 | 10.1016/j.dsx.2019.05.010         |   | 1 |                                   |
| 2603 | 10.1123/japa.2019-0116            |   | 1 | self-efficacy toward non-exercise |
| 2614 | 10.1016/j.cct.2019.05.005         | 1 |   |                                   |
| 2615 | 10.1016/j.healthplace.2019.05.014 |   | 1 | review                            |

|             |                                 |   |   |                                            |
|-------------|---------------------------------|---|---|--------------------------------------------|
| <b>2619</b> | 10.3310/hta23360                |   | 1 | self-efficacy toward non-exercise protocol |
| <b>2631</b> | 10.31616/asj.2018.0172          |   | 1 |                                            |
| <b>2633</b> | 10.1111/ijn.12742               | 1 |   |                                            |
| <b>2655</b> | 10.1111/ggi.13733               |   | 1 | no self-efficacy measured                  |
| <b>2674</b> | 10.1016/j.ctim.2019.07.008      |   | 1 |                                            |
| <b>2681</b> | PMID: 33240353                  | 1 |   |                                            |
| <b>2709</b> | 10.1016/j.neubiorev.2019.09.040 |   | 1 | review                                     |
| <b>2720</b> | 10.1080/08964289.2018.1561411   |   | 1 |                                            |
| <b>2739</b> | 10.1007/s10865-019-00051-2      | 1 |   |                                            |
| <b>2773</b> | 10.1016/j.pmedr.2019.101027     | 1 |   |                                            |
| <b>2790</b> | 10.1002/14651858.CD010215.pub2  |   | 1 | review                                     |
| <b>2804</b> | 10.1111/sms.13613               |   | 1 | self-efficacy toward non-exercise          |
| <b>2816</b> | 10.4040/jkan.2020.50.2.271      |   | 1 |                                            |
| <b>2819</b> | 10.2196/12566                   |   | 1 | no self-efficacy measured                  |
| <b>2824</b> | 10.1123/japa.2018-0413          | 1 |   |                                            |
| <b>2836</b> | 10.1371/journal.pone.0232752    |   | 1 |                                            |
| <b>2837</b> | 10.3390/ijerph17093260          |   | 1 |                                            |
| <b>2839</b> | 10.1186/s12913-020-05292-5      |   | 1 | self-efficacy toward non-exercise          |
| <b>2840</b> | 10.1186/s12877-020-01557-0      |   | 1 | no physical exercise                       |
| <b>2851</b> | 10.1111/scs.12738               |   | 1 | no physical exercise                       |
| <b>2857</b> | 10.1080/0142159X.2020.1732316   |   | 1 | no physical exercise                       |
| <b>2895</b> | 10.4103/jehp.jehp_88_20         |   | 1 |                                            |
| <b>2911</b> | 10.1093/her/cyaa013             |   | 1 |                                            |
| <b>2949</b> | 10.3389/fpsyg.2020.02079        | 1 |   |                                            |
| <b>2954</b> | 10.2196/17835                   | 1 |   |                                            |
| <b>2956</b> | 10.1515/jcim-2019-0064          |   | 1 |                                            |
| <b>2976</b> | PMID: 32877481                  | 1 |   |                                            |
| <b>2987</b> | 10.3390/jcm9103348              |   | 1 |                                            |
| <b>3010</b> | 10.3390/ijerph17218232          |   | 1 |                                            |
| <b>3020</b> | 10.1186/s12966-020-01063-x      |   | 1 |                                            |
| <b>3026</b> | 10.1080/10872981.2020.1759868   | 1 |   |                                            |
| <b>3031</b> | 10.1002/jdd.12336               |   | 1 | no physical exercise                       |
| <b>3035</b> | 10.1016/j.thromres.2020.09.016  |   | 1 |                                            |
| <b>3057</b> | 10.1177/14799731211038673       |   | 1 | self-efficacy toward non-exercise          |
| <b>3066</b> | 10.4103/1735-9066.307346        |   | 1 | erratum                                    |
| <b>3115</b> | 10.1097/HCR.0000000000000594    |   | 1 | no self-efficacy measured                  |
| <b>3128</b> | 10.3389/fpsyg.2021.635651       | 1 |   |                                            |

|             |                                 |           |           |                                          |
|-------------|---------------------------------|-----------|-----------|------------------------------------------|
| <b>3131</b> | 10.1136/bmjopen-2020-046021     |           | 1         | protocol                                 |
| <b>3133</b> | 10.1136/bmjopen-2020-048196     |           | 1         | protocol                                 |
| <b>3150</b> | 10.4040/jkan.20217              |           | 1         | self-efficacy<br>toward non-<br>exercise |
| <b>3163</b> | 10.3390/ijerph18094794          |           | 1         | self-efficacy<br>toward non-<br>exercise |
| <b>3185</b> | 10.3390/ijerph18105359          |           | 1         | review                                   |
| <b>3198</b> | 10.1001/jamainternmed.2021.0991 |           | 1         |                                          |
| <b>3214</b> | PMID: 34306510                  |           | 1         |                                          |
| <b>3216</b> | 10.2196/28708                   |           | 1         |                                          |
| <b>3220</b> | 10.1186/s12889-021-11299-2      | 1         |           |                                          |
| <b>3229</b> | 10.1016/j.jcot.2021.04.007      |           | 1         | review                                   |
| <b>3239</b> | 10.1186/s12885-021-08394-3      |           | 1         | review                                   |
| <b>3255</b> | 10.1016/j.msksp.2021.102380     |           | 1         | qualitative<br>study                     |
| <b>3365</b> | 10.1097/NRL.00000000000000364   |           | 1         | self-efficacy<br>toward non-<br>exercise |
| <b>3371</b> | 10.1016/j.pec.2021.04.017       |           | 1         | qualitative<br>study                     |
| <b>3373</b> | 10.1080/02640414.2021.1957584   | 1         |           |                                          |
| <b>3378</b> | 10.1002/rth2.12622              | 1         |           |                                          |
| <b>3400</b> | 10.1002/jor.25072               |           | 1         | self-efficacy<br>toward non-<br>exercise |
| <b>3410</b> | 10.3389/fpsyg.2021.794777       |           | 1         |                                          |
| <b>3423</b> | 10.1080/09638288.2020.1781940   |           | 1         | qualitative<br>study                     |
| <b>3427</b> | 10.1007/s10926-021-09962-x      |           | 1         | review                                   |
| <b>3430</b> | 10.1002/pon.5820                |           | 1         |                                          |
| <b>3437</b> | 10.1080/17461391.2021.1880645   | 1         |           |                                          |
| <b>3438</b> | 10.1007/s10903-021-01194-8      |           | 1         |                                          |
|             |                                 | <b>80</b> | <b>92</b> | <b>79</b>                                |
